CORRECTION

# Correction: Modeling Occupancy of Hosts by Mistletoe Seeds after Accounting for Imperfect Detectability

Rodrigo F. Fadini, Renato Cintra

The images for Figs 2 and 3 are incorrectly switched. The image that appears as Fig 2 should be Fig 3, and the image that appears for Fig 3 should be Fig 2. The figure captions appear in the correct order. Please see the corrected Figs [2](#) and [3](#) here.

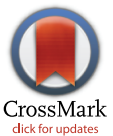

 OPEN ACCESS

**Citation:** Fadini RF, Cintra R (2016) Correction: Modeling Occupancy of Hosts by Mistletoe Seeds after Accounting for Imperfect Detectability. PLoS ONE 11(9): e0163008. doi:10.1371/journal.pone.0163008

**Published:** September 16, 2016

**Copyright:** © 2016 Fadini, Cintra. This is an open access article distributed under the terms of the [Creative Commons Attribution License](#), which permits unrestricted use, distribution, and reproduction in any medium, provided the original author and source are credited.

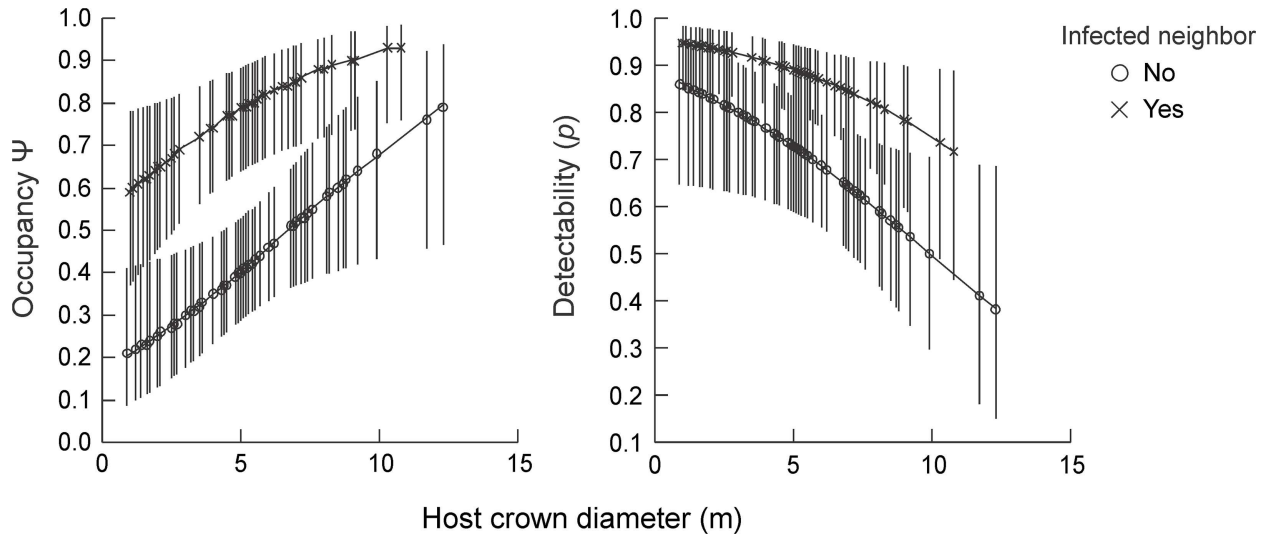

**Fig 2. Occupancy and detection probability of mistletoe seeds of *Psittacanthus plagiophyllus* deposited on the host *Anacardium occidentale* according to proximity to infected hosts host size (host crown diameter).** Central markers represent means, and lines represent 95% confidence intervals. Both graphs were traced with estimates from the model  $\Psi$  (size+neighborhood),  $p$  (size+neighborhood).

doi:10.1371/journal.pone.0163008.g001

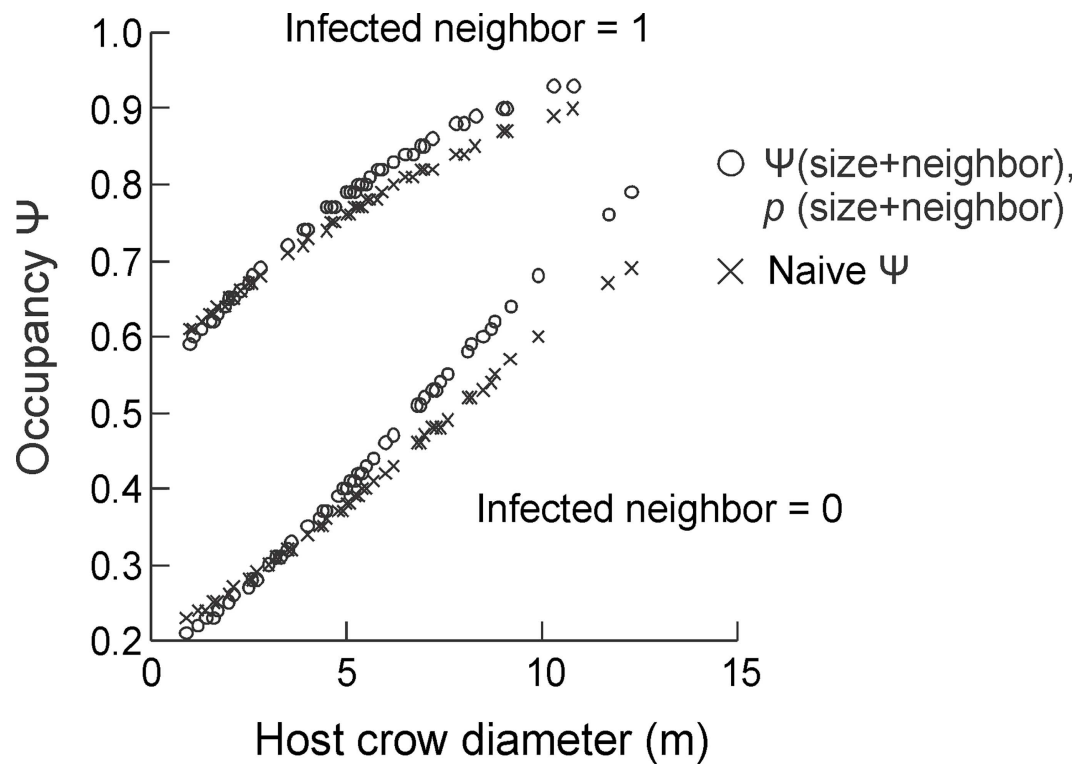

**Fig 3. Comparison of occupancy estimates of seeds of *Psittacanthus plagiophyllus* between two models: one using naïve estimates fitted with a logistic regression ( $\logit(p) = 0.251 + 0.18(\text{host crown}) - 1.64(\text{neighbor})$ ), and other using occupancy estimates accounted for detectability (first model of Table 1).**

doi:10.1371/journal.pone.0163008.g002

## Reference

1. Fadini RF, Cintra R (2015) Modeling Occupancy of Hosts by Mistletoe Seeds after Accounting for Imperfect Detectability. PLoS ONE 10(5): e0127004. doi:[10.1371/journal.pone.0127004](https://doi.org/10.1371/journal.pone.0127004) PMID: [25973754](https://pubmed.ncbi.nlm.nih.gov/25973754/)
